# Supplementary material for: Foraging behaviour and ecology of transient killer whales within a deep submarine canyon system
Source: PLoS One. 2024 Mar 20;19(3):e0299291. doi: 10.1371/journal.pone.0299291 (PMC10954312; doi:10.1371/journal.pone.0299291)
Supplement: S4 Table — Table providing information on date, season, and group size, transient killer whales collected from whale watch ecotours. (XLSX) [file pone.0299291.s004.xlsx]

## Sheet: Sheet1
Group_size	Date	Year	Month	Day	Month_A	Season
1	2014-03-03	2014	3	3	March	Spring
1	2014-03-15	2014	3	15	March	Spring
2	2014-03-19	2014	3	19	March	Spring
2	2014-03-19	2014	3	19	March	Spring
28	2014-04-14	2014	4	14	April	Spring
28	2014-04-14	2014	4	14	April	Spring
28	2014-04-14	2014	4	14	April	Spring
28	2014-04-14	2014	4	14	April	Spring
28	2014-04-14	2014	4	14	April	Spring
28	2014-04-14	2014	4	14	April	Spring
28	2014-04-14	2014	4	14	April	Spring
28	2014-04-14	2014	4	14	April	Spring
28	2014-04-14	2014	4	14	April	Spring
3	2014-04-20	2014	4	20	April	Spring
12	2014-04-20	2014	4	20	April	Spring
12	2014-04-20	2014	4	20	April	Spring
12	2014-04-20	2014	4	20	April	Spring
12	2014-04-20	2014	4	20	April	Spring
12	2014-04-20	2014	4	20	April	Spring
3	2014-04-20	2014	4	20	April	Spring
1	2014-08-10	2014	8	10	August	Summer
4	2014-08-10	2014	8	16	August	Summer
7	2014-08-24	2014	8	24	August	Summer
7	2014-08-24	2014	8	24	August	Summer
7	2014-08-24	2014	8	24	August	Summer
4	2014-09-22	2014	9	22	September	Fall
1	2014-09-30	2014	9	30	September	Fall
6	2016-01-16	2016	1	16	January	Winter
11	2016-02-03	2016	2	3	February	Winter
11	2016-02-03	2016	2	3	February	Winter
11	2016-02-03	2016	2	3	February	Winter
11	2016-02-03	2016	2	3	February	Winter
11	2016-02-03	2016	2	3	February	Winter
6	2016-02-21	2016	2	21	February	Winter
6	2016-02-21	2016	2	21	February	Winter
6	2016-02-21	2016	2	21	February	Winter
6	2016-02-28	2016	2	28	February	Winter
6	2016-02-28	2016	2	28	February	Winter
6	2016-02-28	2016	2	28	February	Winter
5	2016-03-01	2016	3	1	March	Spring
5	2016-03-01	2016	3	1	March	Spring
1	2016-03-07	2016	3	7	March	Spring
6	2016-03-23	2016	3	23	March	Spring
6	2016-03-23	2016	3	23	March	Spring
6	2016-03-23	2016	3	23	March	Spring
12	2016-04-05	2016	4	5	April	Spring
12	2016-04-05	2016	4	5	April	Spring
12	2016-04-05	2016	4	5	April	Spring
12	2016-04-05	2016	4	5	April	Spring
12	2016-04-05	2016	4	5	April	Spring
12	2016-04-05	2016	4	5	April	Spring
12	2016-04-05	2016	4	5	April	Spring
3	2016-04-10	2016	4	10	April	Spring
9	2016-04-11	2016	4	11	April	Spring
9	2016-04-11	2016	4	11	April	Spring
9	2016-04-11	2016	4	11	April	Spring
9	2016-04-11	2016	4	11	April	Spring
9	2016-04-11	2016	4	11	April	Spring
4	2016-04-16	2016	4	16	April	Spring
13	2016-04-17	2016	4	17	April	Spring
13	2016-04-17	2016	4	17	April	Spring
13	2016-04-17	2016	4	17	April	Spring
13	2016-04-17	2016	4	17	April	Spring
13	2016-04-17	2016	4	17	April	Spring
14	2016-05-07	2016	5	7	May	Spring
14	2016-05-07	2016	5	7	May	Spring
14	2016-05-07	2016	5	7	May	Spring
14	2016-05-07	2016	5	7	May	Spring
17	2016-05-15	2016	5	15	May	Spring
17	2016-05-15	2016	5	15	May	Spring
17	2016-05-15	2016	5	15	May	Spring
17	2016-05-15	2016	5	15	May	Spring
17	2016-05-15	2016	5	15	May	Spring
17	2016-05-15	2016	5	15	May	Spring
8	2016-06-05	2016	6	5	June	Summer
8	2016-06-05	2016	6	5	June	Summer
1	2016-06-06	2016	6	6	June	Summer
6	2016-06-06	2016	6	6	June	Summer
6	2016-06-06	2016	6	6	June	Summer
6	2016-06-06	2016	6	6	June	Summer
6	2016-06-30	2016	6	30	June	Summer
6	2016-06-30	2016	6	30	June	Summer
6	2016-06-30	2016	6	30	June	Summer
2	2016-09-15	2016	9	15	September	Fall
2	2017-01-17	2017	1	17	January	Winter
26	2017-04-21	2017	4	21	April	Spring
26	2017-04-21	2017	4	21	April	Spring
26	2017-04-21	2017	4	21	April	Spring
26	2017-04-21	2017	4	21	April	Spring
26	2017-04-21	2017	4	21	April	Spring
26	2017-04-21	2017	4	21	April	Spring
26	2017-04-21	2017	4	21	April	Spring
26	2017-04-21	2017	4	21	April	Spring
26	2017-04-21	2017	4	21	April	Spring
26	2017-04-21	2017	4	21	April	Spring
15	2017-04-22	2017	4	22	April	Spring
15	2017-04-22	2017	4	22	April	Spring
4	2017-05-11	2017	5	11	May	Spring
12	2017-05-18	2017	5	18	May	Spring
12	2017-05-18	2017	5	18	May	Spring
12	2017-05-18	2017	5	18	May	Spring
12	2017-05-18	2017	5	18	May	Spring
12	2017-05-18	2017	5	18	May	Spring
12	2017-05-18	2017	5	18	May	Spring
12	2017-05-18	2017	5	18	May	Spring
7	2017-05-19	2017	5	19	May	Spring
7	2017-05-19	2017	5	19	May	Spring
7	2017-05-26	2017	5	26	May	Spring
7	2017-05-26	2017	5	26	May	Spring
7	2017-05-26	2017	5	26	May	Spring
14	2017-05-27	2017	5	27	May	Spring
14	2017-05-27	2017	5	27	May	Spring
14	2017-05-27	2017	5	27	May	Spring
14	2017-05-27	2017	5	27	May	Spring
14	2017-05-27	2017	5	27	May	Spring
16	2017-06-25	2017	6	25	June	Summer
16	2017-06-25	2017	6	25	June	Summer
16	2017-06-25	2017	6	25	June	Summer
16	2017-06-25	2017	6	25	June	Summer
16	2017-06-25	2017	6	25	June	Summer
7	2017-07-03	2017	7	3	July	Summer
7	2017-07-03	2017	7	3	July	Summer
7	2017-07-03	2017	7	3	July	Summer
5	2017-09-23	2017	9	23	September	Fall
5	2017-09-23	2017	9	23	September	Fall
5	2017-09-26	2017	9	26	September	Fall
3	2017-10-15	2017	10	15	October	Fall
4	2018-02-03	2018	2	3	February	Winter
9	2018-02-17	2018	2	17	February	Winter
9	2018-02-17	2018	2	17	February	Winter
9	2018-02-17	2018	2	17	February	Winter
9	2018-02-17	2018	2	17	February	Winter
9	2018-02-17	2018	2	17	February	Winter
6	2018-02-20	2018	2	20	February	Winter
6	2018-02-20	2018	2	20	February	Winter
9	2018-03-18	2018	3	18	March	Spring
9	2018-03-18	2018	3	18	March	Spring
9	2018-03-18	2018	3	18	March	Spring
9	2018-03-18	2018	3	18	March	Spring
9	2018-03-18	2018	3	18	March	Spring
9	2018-03-18	2018	3	18	March	Spring
5	2018-04-03	2018	4	3	April	Spring
5	2018-04-03	2018	4	3	April	Spring
5	2018-04-03	2018	4	3	April	Spring
4	2018-04-05	2018	4	5	April	Spring
4	2018-04-05	2018	4	5	April	Spring
4	2018-04-05	2018	4	5	April	Spring
1	2018-04-09	2018	4	9	April	Spring
4	2018-04-13	2018	4	13	April	Spring
11	2018-04-14	2018	4	14	April	Spring
11	2018-04-14	2018	4	14	April	Spring
11	2018-04-14	2018	4	14	April	Spring
9	2018-04-18	2018	4	18	April	Spring
9	2018-04-18	2018	4	18	April	Spring
9	2018-04-18	2018	4	18	April	Spring
10	2018-04-21	2018	4	21	April	Spring
10	2018-04-21	2018	4	21	April	Spring
10	2018-04-21	2018	4	21	April	Spring
10	2018-04-21	2018	4	21	April	Spring
10	2018-04-21	2018	4	21	April	Spring
10	2018-04-21	2018	4	21	April	Spring
7	2018-04-28	2018	4	28	April	Spring
7	2018-04-28	2018	4	28	April	Spring
7	2018-04-28	2018	4	28	April	Spring
10	2018-05-02	2018	5	2	May	Spring
10	2018-05-02	2018	5	2	May	Spring
10	2018-05-02	2018	5	2	May	Spring
10	2018-05-02	2018	5	2	May	Spring
10	2018-05-02	2018	5	2	May	Spring
10	2018-05-02	2018	5	2	May	Spring
2	2018-05-04	2018	5	4	May	Spring
13	2018-05-06	2018	5	6	May	Spring
13	2018-05-06	2018	5	6	May	Spring
13	2018-05-06	2018	5	6	May	Spring
13	2018-05-06	2018	5	6	May	Spring
23	2018-05-07	2018	5	7	May	Spring
23	2018-05-07	2018	5	7	May	Spring
23	2018-05-07	2018	5	7	May	Spring
23	2018-05-07	2018	5	7	May	Spring
23	2018-05-07	2018	5	7	May	Spring
23	2018-05-07	2018	5	7	May	Spring
23	2018-05-07	2018	5	7	May	Spring
23	2018-05-07	2018	5	7	May	Spring
23	2018-05-07	2018	5	7	May	Spring
23	2018-05-07	2018	5	7	May	Spring
7	2018-05-13	2018	5	13	May	Spring
7	2018-05-13	2018	5	13	May	Spring
7	2018-05-13	2018	5	13	May	Spring
4	2018-05-23	2018	5	23	May	Spring
4	2018-05-23	2018	5	23	May	Spring
1	2018-08-25	2018	8	25	August	Summer
1	2018-09-03	2018	9	3	September	Fall
7	2018-09-05	2018	9	5	September	Fall
5	2018-09-12	2018	9	12	September	Fall
5	2018-09-12	2018	9	12	September	Fall
1	2018-09-19	2018	9	19	September	Fall
4	2018-09-30	2018	9	30	September	Fall
9	2018-10-03	2018	10	3	October	Fall
9	2018-10-03	2018	10	3	October	Fall
9	2018-10-03	2018	10	3	October	Fall
1	2019-03-18	2019	3	18	March	Spring
8	2019-04-03	2019	4	3	April	Spring
8	2019-04-03	2019	4	3	April	Spring
8	2019-04-03	2019	4	3	April	Spring
4	2019-04-08	2019	4	8	April	Spring
8	2019-04-13	2019	4	13	April	Spring
8	2019-04-13	2019	4	13	April	Spring
8	2019-04-13	2019	4	13	April	Spring
1	2019-04-14	2019	4	14	April	Spring
8	2019-04-16	2019	4	16	April	Spring
4	2019-04-24	2019	4	24	April	Spring
5	2019-04-27	2019	4	27	April	Spring
5	2019-04-27	2019	4	27	April	Spring
5	2019-04-27	2019	4	27	April	Spring
9	2019-04-30	2019	4	30	April	Spring
7	2019-05-05	2019	5	5	May	Spring
7	2019-05-05	2019	5	5	May	Spring
7	2019-05-05	2019	5	5	May	Spring
4	2019-05-10	2019	5	10	May	Spring
5	2019-05-30	2019	5	30	May	Spring
5	2019-05-30	2019	5	30	May	Spring
5	2019-05-30	2019	5	30	May	Spring
5	2019-05-30	2019	5	30	May	Spring
4	2019-06-07	2019	6	7	June	Summer
4	2019-06-11	2019	6	11	June	Summer
4	2019-06-11	2019	6	11	June	Summer
4	2019-06-14	2019	6	14	June	Summer
4	2019-06-14	2019	6	14	June	Summer
4	2019-06-14	2019	6	14	June	Summer
8	2019-06-17	2019	6	17	June	Summer
8	2019-06-17	2019	6	17	June	Summer
4	2019-06-18	2019	6	18	June	Summer
4	2019-06-18	2019	6	18	June	Summer
4	2019-06-18	2019	6	18	June	Summer
4	2019-06-18	2019	6	18	June	Summer
8	2019-06-19	2019	6	19	June	Summer
9	2019-09-07	2019	9	7	September	Fall
9	2019-09-07	2019	9	7	September	Fall
9	2019-09-07	2019	9	7	September	Fall
3	2019-09-12	2019	9	12	September	Fall
3	2019-09-12	2019	9	12	September	Fall
3	2019-09-12	2019	9	12	September	Fall
6	2019-10-10	2019	10	10	October	Fall
6	2019-10-10	2019	10	10	October	Fall
6	2019-10-10	2019	10	10	October	Fall
6	2019-10-15	2019	10	15	October	Fall
6	2019-10-15	2019	10	15	October	Fall
6	2019-10-15	2019	10	15	October	Fall
4	2019-11-10	2019	11	10	November	Fall
3	2019-12-23	2019	12	23	December	Winter
3	2019-12-23	2019	12	23	December	Winter
3	2021-01-02	2021	1	2	January	Winter
3	2021-01-02	2021	1	2	January	Winter
3	2021-01-02	2021	1	2	January	Winter
3	2021-01-30	2021	1	30	January	Winter
3	2021-01-30	2021	1	30	January	Winter
3	2021-01-30	2021	1	30	January	Winter
4	2021-02-07	2021	2	7	February	Winter
4	2021-03-24	2021	3	24	March	Spring
6	2021-04-03	2021	4	3	April	Spring
6	2021-04-03	2021	4	3	April	Spring
6	2021-04-03	2021	4	3	April	Spring
7	2021-04-04	2021	4	4	April	Spring
11	2021-04-14	2021	4	14	April	Spring
11	2021-04-14	2021	4	14	April	Spring
11	2021-04-14	2021	4	14	April	Spring
11	2021-04-17	2021	4	17	April	Spring
11	2021-04-17	2021	4	17	April	Spring
11	2021-04-17	2021	4	17	April	Spring
24	2021-04-18	2021	4	18	April	Spring
24	2021-04-18	2021	4	18	April	Spring
24	2021-04-18	2021	4	18	April	Spring
24	2021-04-18	2021	4	18	April	Spring
24	2021-04-18	2021	4	18	April	Spring
24	2021-04-18	2021	4	18	April	Spring
24	2021-04-18	2021	4	18	April	Spring
6	2021-04-19	2021	4	19	April	Spring
6	2021-04-19	2021	4	19	April	Spring
4	2021-04-21	2021	4	21	April	Spring
15	2021-04-23	2021	4	23	April	Spring
15	2021-04-23	2021	4	23	April	Spring
15	2021-04-23	2021	4	23	April	Spring
15	2021-04-23	2021	4	23	April	Spring
6	2021-04-27	2021	4	27	April	Spring
6	2021-04-27	2021	4	27	April	Spring
3	2021-04-29	2021	4	29	April	Spring
3	2021-04-29	2021	4	29	April	Spring
3	2021-05-04	2021	5	4	May	Spring
12	2021-05-04	2021	5	4	May	Spring
12	2021-05-04	2021	5	4	May	Spring
10	2021-05-06	2021	5	6	May	Spring
10	2021-05-06	2021	5	6	May	Spring
10	2021-05-06	2021	5	6	May	Spring
10	2021-05-12	2021	5	12	May	Spring
10	2021-05-12	2021	5	12	May	Spring
10	2021-05-12	2021	5	12	May	Spring
5	2021-05-14	2021	5	14	May	Spring
4	2021-05-24	2021	5	24	May	Spring
4	2021-05-24	2021	5	24	May	Spring
4	2021-06-24	2021	6	24	June	Summer
4	2021-06-24	2021	6	24	June	Summer
2	2021-08-09	2021	8	9	August	Summer
2	2021-08-29	2021	8	29	August	Summer
2	2021-08-29	2021	8	29	August	Summer
7	2021-09-07	2021	9	7	September	Fall
7	2021-09-07	2021	9	7	September	Fall
7	2021-09-07	2021	9	7	September	Fall
2	2021-09-12	2021	9	12	September	Fall
2	2021-09-12	2021	9	12	September	Fall
6	2021-10-15	2021	10	15	October	Fall
6	2021-10-15	2021	10	15	October	Fall
6	2021-10-15	2021	10	15	October	Fall
2	2021-10-20	2021	10	20	October	Fall
5	2021-11-04	2021	11	4	November	Fall
5	2021-11-04	2021	11	4	November	Fall
7	2021-11-08	2021	11	8	November	Fall
7	2021-11-08	2021	11	8	November	Fall
5	2021-11-28	2021	11	28	November	Fall
1	2021-12-03	2021	12	3	December	Winter
4	2021-12-07	2021	12	7	December	Winter
5	2021-12-10	2021	12	10	December	Winter
5	2021-12-10	2021	12	10	December	Winter
9	2021-12-22	2021	12	22	December	Winter
